# Supplementary material for: Broadening spectral responses and achieving environmental stability in SnS2/Ag-NPs/HfO2 flexible phototransistors
Source: Royal Society of Chemistry journal article supplement (doi:10.1039/d3nr04626e), 2024-01-01
Supplement: d3nr04626e1.pdf [file d3nr04626e1.pdf]

## Supporting Information

### **Broadening Spectral Response and Achieving Environmental Stability in SnS<sub>2</sub>/Ag-NPs/HfO<sub>2</sub> Flexible Phototransistor**

Muhammad Farooq Khan<sup>1#</sup>, Sana Sadaqat<sup>2#</sup>, Muhammad Asghar Khan<sup>3#</sup>, Shania Rehman<sup>4</sup>,  
Waqas Subhani<sup>5</sup>, Mohamed Ouladsmane<sup>6</sup>, Malik Abdul Rehman<sup>7</sup>, Fida Ali<sup>8</sup>, Harri Lipsanen<sup>8</sup>,  
Zhipei Sun<sup>8</sup>, Jonghwa Eom<sup>3\*</sup> and Faisal Ahmed<sup>8\*</sup>

<sup>1</sup>Department of Electrical Engineering, Sejong University, Seoul 05006, Republic of Korea.

<sup>2</sup>Department of Physics, Riphah International University, Faisalabad Campus, Pakistan.

<sup>3</sup>Department of Physics and Astronomy, Sejong University, Seoul 05006, Republic of Korea.

<sup>4</sup>Department of Semiconductor System Engineering, Sejong University, Seoul 05006, Republic of Korea.

<sup>5</sup>Department of Physics University of Lahore, Lahore, 53700, Pakistan

<sup>6</sup>Department of Chemistry, College of Science, King Saud University, Riyadh, 11451, Saudi Arabia.

<sup>7</sup>Department of Chemical Engineering, New Uzbekistan University, Tashkent, 100007, Uzbekistan

<sup>8</sup>Department of Electronics and Nano engineering, Aalto University, P.O. Box 13500, FI-00076 Aalto,  
Finland.

# These authors contributed equally

Corresponding authors: [faisal.ahmed@aalto.fi](mailto:faisal.ahmed@aalto.fi) and [eom@sejong.ac.kr](mailto:eom@sejong.ac.kr)

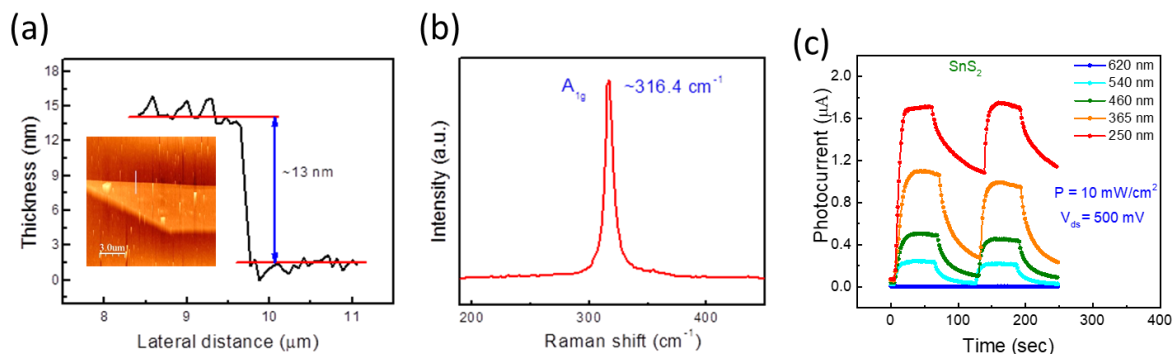

**Figure S1: Characterization of SnS<sub>2</sub> device.** (a) Thickness profile of SnS<sub>2</sub> device obtained by atomic force microscopy. Inset: topographic image of SnS<sub>2</sub> flake. (b) Room temperature Raman spectrum of SnS<sub>2</sub> flake depicting single A<sub>1g</sub> peak. (c) Time-dependent photocurrent of SnS<sub>2</sub> device.

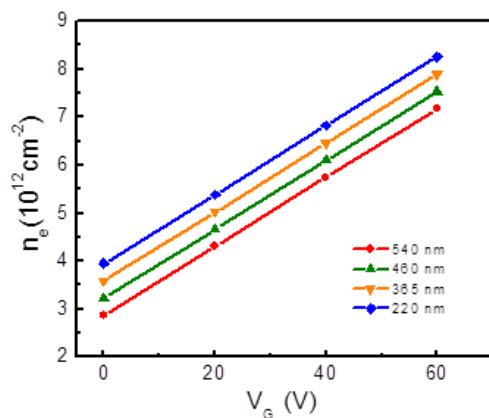

**Figure S2: Carrier concentration at different gating conditions.** The electron concentration [ $n_e = C_{ox}(V_g - V_{th})$ ] at  $V_g$  values (0, 20, 40, and 60V) is calculated, and it shows an increasing trend as we irradiate the lower wavelength light. This demonstrates that the devices under light having lower (higher) wavelengths generate large (small) carriers, which can improve the charge density and field-effect mobility of the SnS<sub>2</sub> transistor.

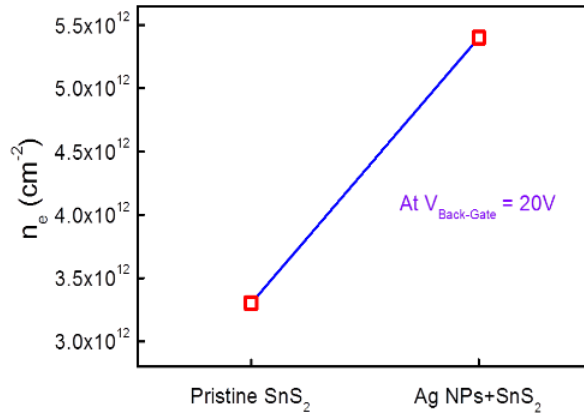

**Figure S3: Comparison of carrier concentration.** The electron carrier density of pristine  $\text{SnS}_2$  and  $\text{SnS}_2+\text{Ag}(\text{NPs})$  at  $V_g = 20\text{V}$ .

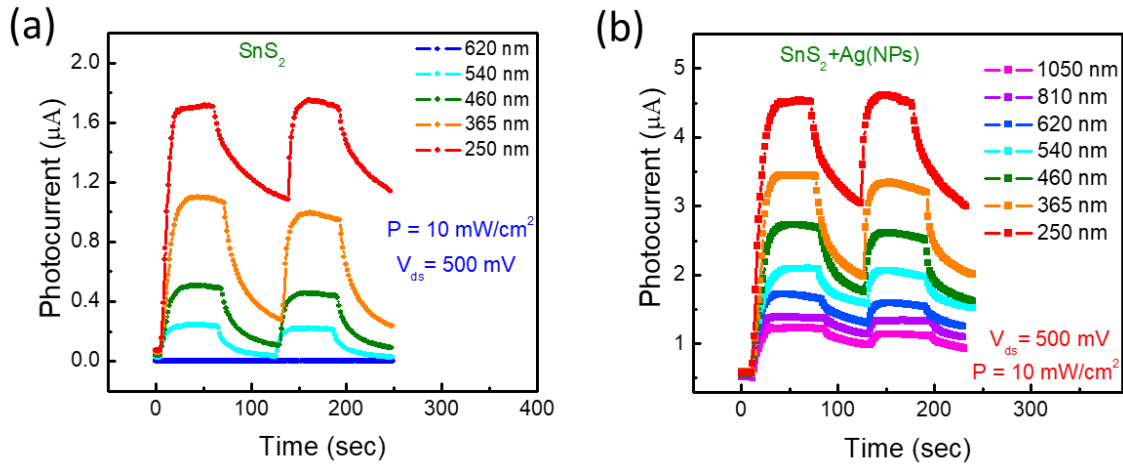

**Figure S4: Comparison of temporal photocurrent.** The time-dependent photocurrent of pristine  $\text{SnS}_2$  and  $\text{SnS}_2/\text{Ag-NPs}$  at  $V_g = 0\text{V}$  and  $V_{ds} = 500\text{mV}$ . The light intensity was kept at  $10\text{mW}/\text{cm}^2$  during all the wavelength irradiation.

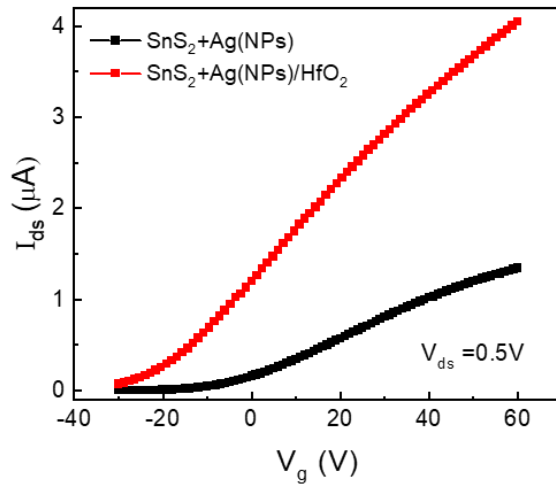

**Figure S5: Transfer curve comparison.** The transfer curves of SnS<sub>2</sub>/Ag-NPs and SnS<sub>2</sub>/Ag-NPs/HfO<sub>2</sub> transistors.

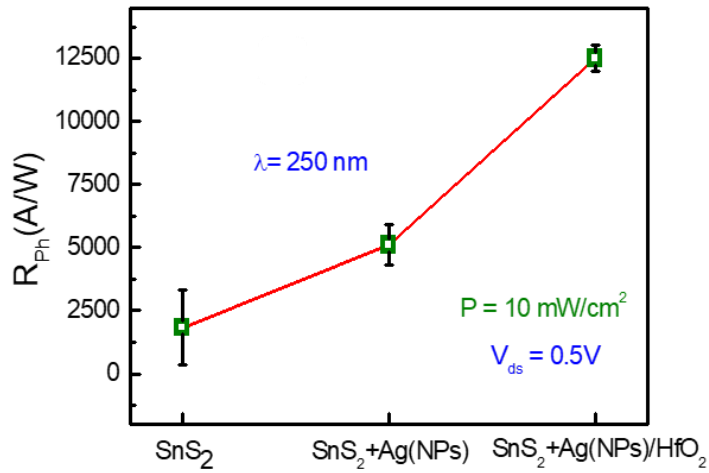

**Figure S6: Enhancement in photoresponsivity for different device configuration.** The comparative photoresponsivity of SnS<sub>2</sub>, SnS<sub>2</sub>/Ag-NPs and SnS<sub>2</sub>/Ag-NPs/HfO<sub>2</sub> photodetectors at  $V_g = 0V$ .

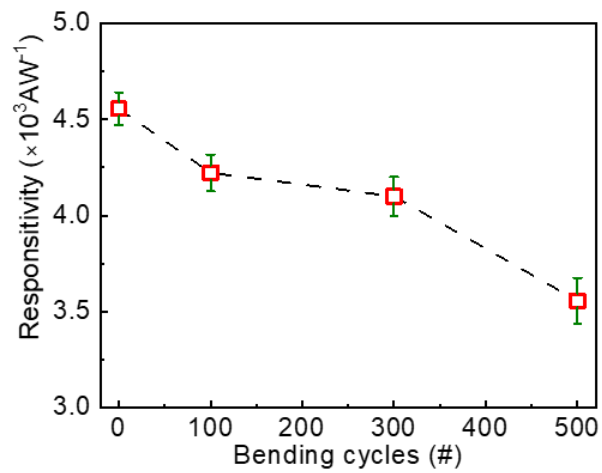

**Figure S7: Effect of bending cycles on photoresponsivity.** The responsivity of flexible SnS<sub>2</sub>/Ag-NPs photodetector for repeated bending cycles at  $\lambda = 250 \text{ nm}$ ,  $P = 10 \text{ mW/cm}^2$ .

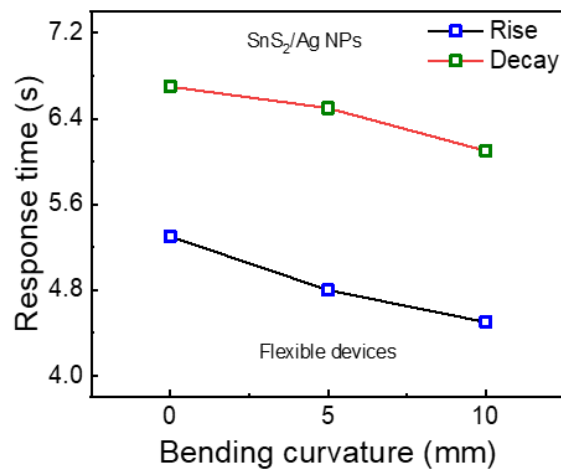

**Figure S8.** The rise (blue square) and decay (green square) times of SnS<sub>2</sub>/Ag-NPs photodetectors under  $\lambda = 250 \text{ nm}$  at various bending states.

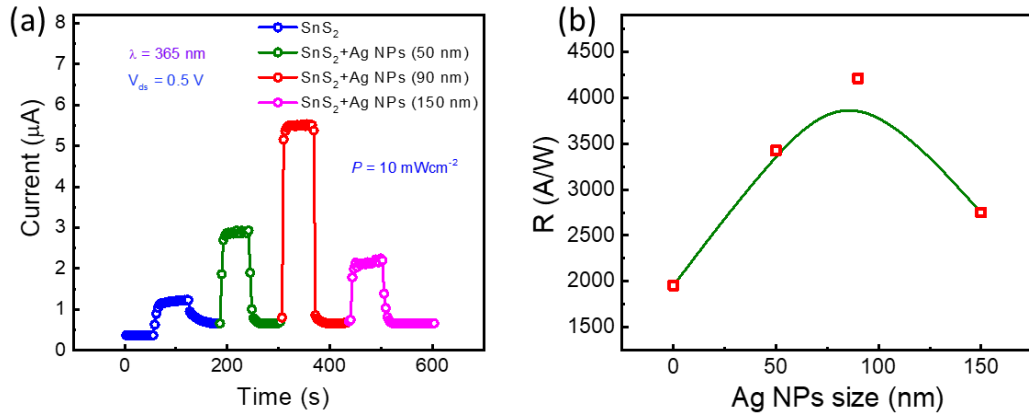

**Figure S9.** (a) The drain current of SnS<sub>2</sub> photodetectors under light  $\lambda = 365$  nm while decorating the different size of Ag NPs. (b) The photoresponsivity of SnS<sub>2</sub> photodetectors at various sizes of Ag NPs.

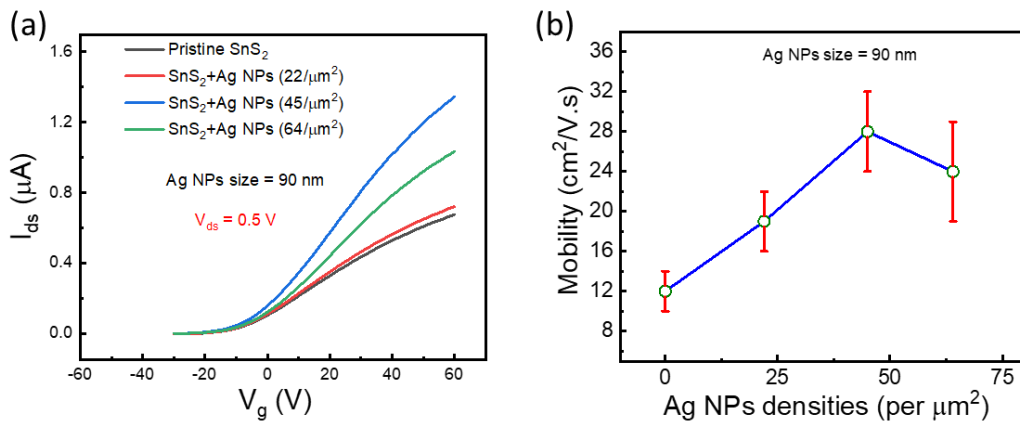

**Figure S10.** (a) The transfer curves of SnS<sub>2</sub> transistors with decoration of Ag NPs (90 nm) having different densities. (b) Field effect mobilities of SnS<sub>2</sub>/Ag NPs (90 nm) transistors with various densities.
